# Supplementary material for: Extracellular vesicle integrins act as a nexus for platelet adhesion in cerebral microvessels
Source: PubMed Central journal article supplement (PMC6825169; doi:10.1038/s41598-019-52127-3), 2019-11-01
Supplement: 41598_2019_52127_MOESM1_ESM.pdf [file 41598_2019_52127_MOESM1_ESM.pdf]

## **SUPPLEMENTARY FIGURES**

### **Extracellular vesicle integrins act as a nexus for platelet adhesion in cerebral microvessels**

Zsolt Bagi, Yvonne Couch, Zuzana Broskova, Francisco Perez-Balderas, Tianrong Yeo, Simon Davis, Roman Fischer, Nicola R. Sibson, Benjamin G. Davis, Daniel C. Anthony

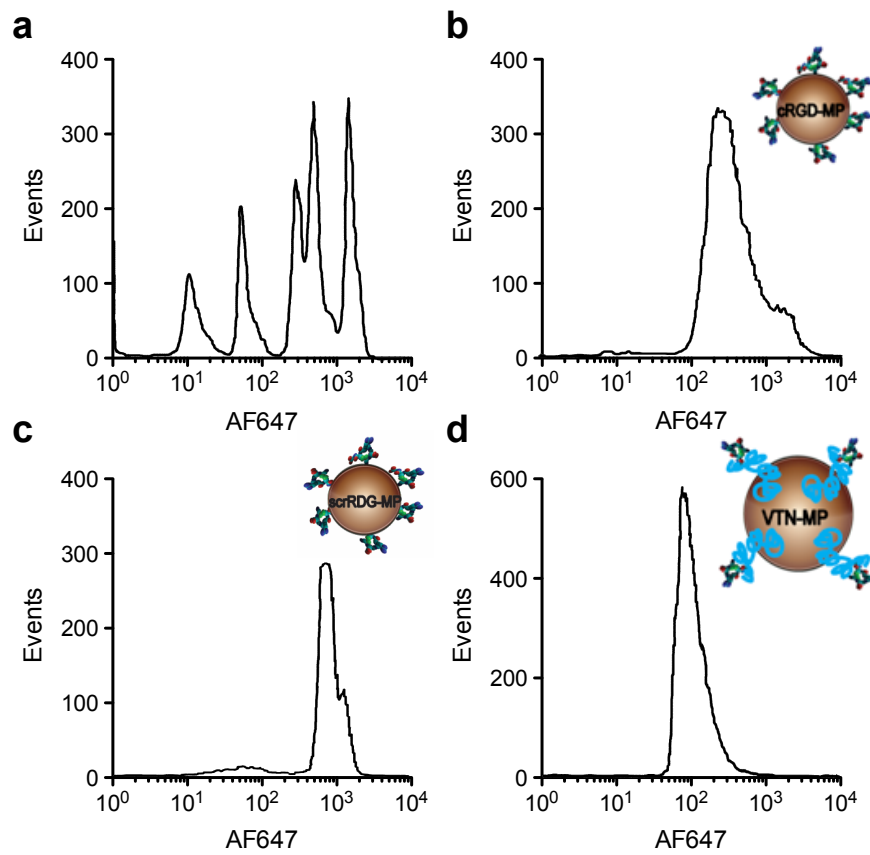

**e**

| Sample    | Size ( $\mu\text{m}$ ) | Surface Density (agent/particle) | Surface Density (agent/ $\mu\text{m}^2$ ) |
|-----------|------------------------|----------------------------------|-------------------------------------------|
| cRGD-MP   | 1.0                    | 146597                           | 46778                                     |
| scrRGD-MP | 1.0                    | 259661                           | 82653                                     |
| VTN-MP    | 2.8                    | 17384                            | 706                                       |

**Supplementary Figure 1.** Flow cytometry demonstrating labeling efficiency and size of particles; (a) calibration beads at (SIZES); (b) cRGD-linked MPs; (c) scrambled-RGD-linked MPs; (d) VTN-linked MPs; (e) Qifikit assay demonstrating effective labeling of synthetic MPs (agent/ $\mu\text{m}^2$ ).

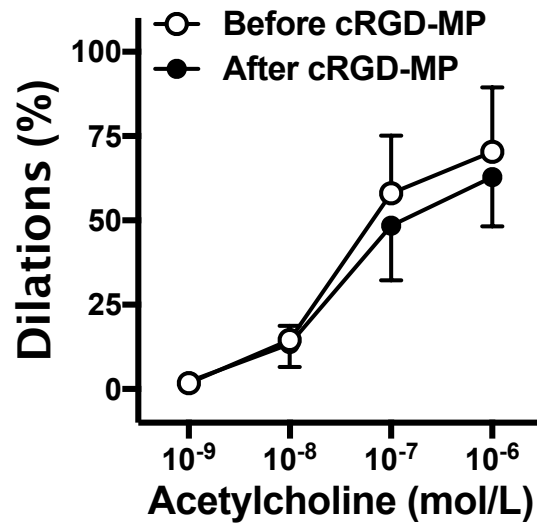

**Supplementary Figure 2.** Effect of cRGD-MPs on endothelium-dependent vasodilation. Summary data of dilatations in response to cumulative concentrations of acetylcholine (10<sup>-9</sup> to 10<sup>-6</sup> M) in isolated and pressurized middle cerebral artery, before and after intraluminal delivery of cRGD-MPs (0.1 µg/ml, N=4).

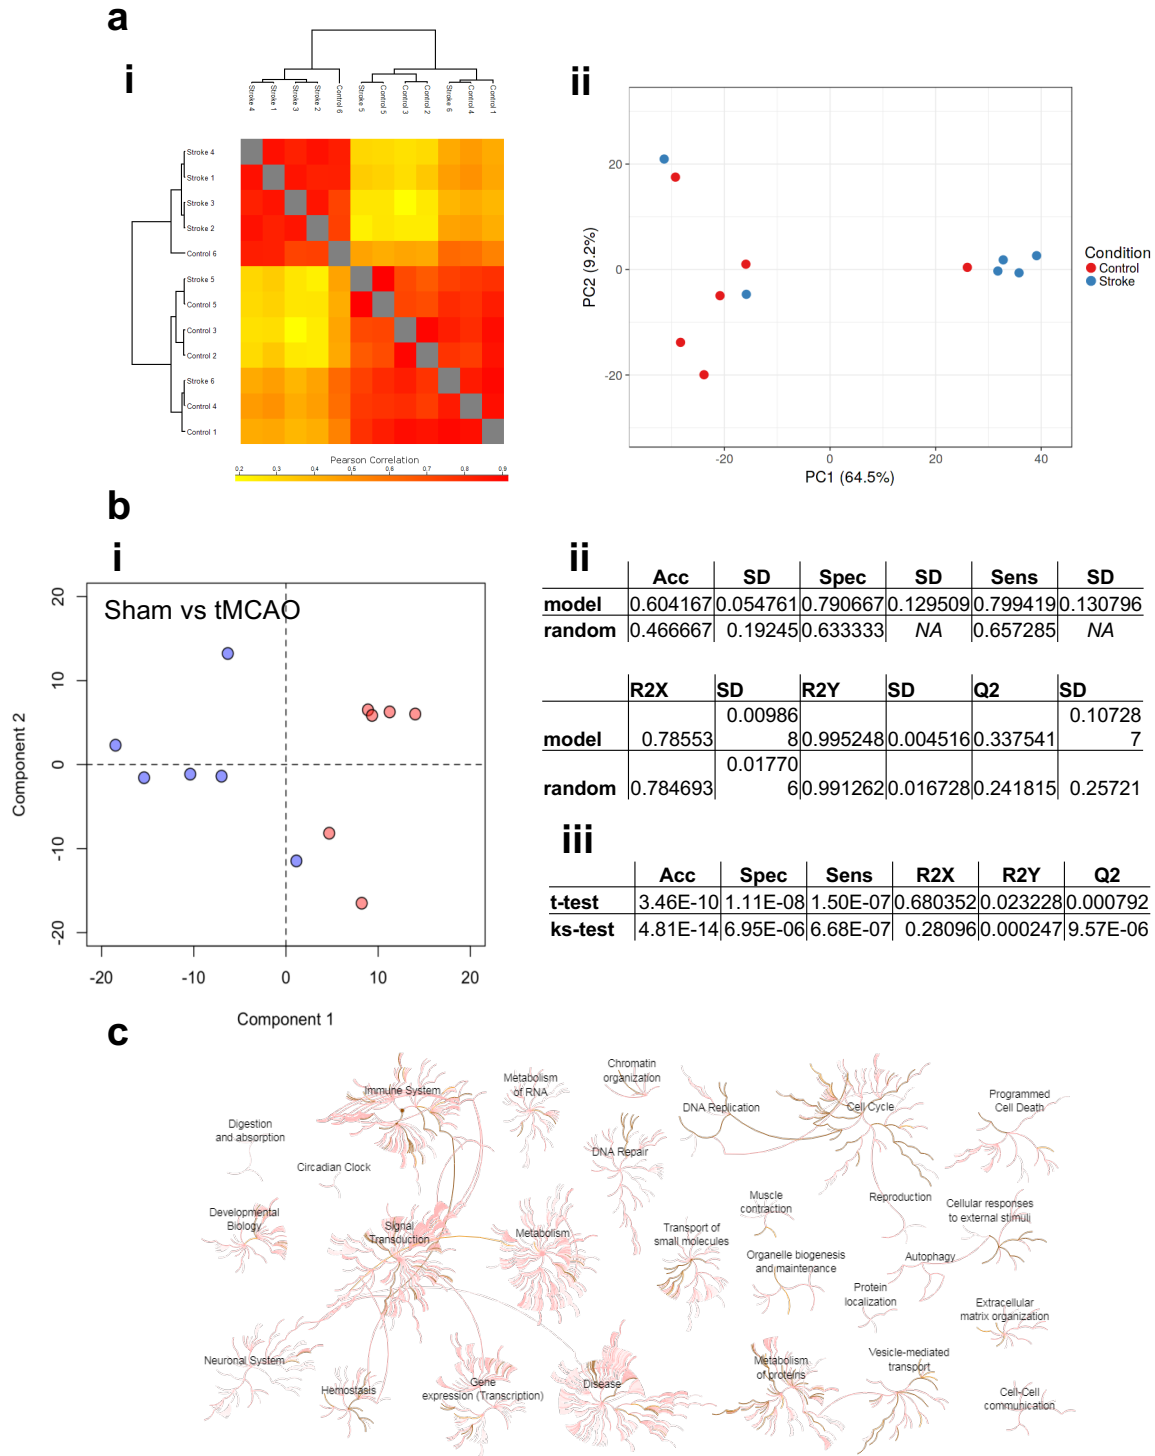

**Supplementary Figure 3.** Proteomic analysis of EVs in stroke vs. control animals. **a)** Comparison of samples using protein quantitation values determined by liquid-chromatography mass-spectrometry using the 220 proteins that were detected in at least 5 of 6 replicates. **(ai)** Pearson

correlation matrix of samples. Rows and columns are grouped by hierarchical clustering using Euclidean distance. **(aii)** Principal component analysis of samples. The X and Y axis show principal component 1 and 2, which explain 64.5 % and 9.2 % of the total variance respectively. **(bi)** Orthogonal partial-least square determinant analysis (OPLS-DA) scores plot shows good separation between sham and tMCAO animals. **(bii)** The mean accuracy of the OPLS-DA model for sham vs tMCAO is 60.4% while the mean accuracy for the OPLS-DA model for random class assignment is 46.7%. **(biii)** Summary indices of the OPLS-DA model for sham vs tMCAO model. p values indicated are obtained by Kolmogorov-Smirnov test of the sham vs tMCAO OPLS-DA model compared to the random class assignment OPLS-DA model. **(c)** The pathways that are enriched in the EV proteome, which includes vesicle-mediated transport among others.
